# Supplementary material
Source: PubMed Central journal article supplement (PMC3870732)
Supplement: 1314289110_pnas.201314289SI.pdf [file 1314289110_pnas.201314289SI.pdf]

# Supporting Information

Das et al. 10.1073/pnas.1314289110

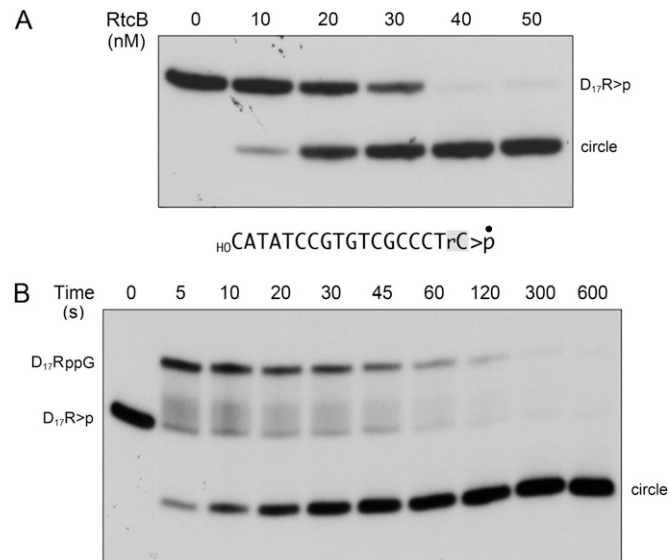

**Fig. 51.** RtcB splices 5'-OH DNA with a ribonucleoside-2',3'-cyclic-PO<sub>4</sub> terminus. (A) Reaction mixtures (10  $\mu$ L) containing 50 mM Tris-HCl (pH 8.0), 2 mM MnCl<sub>2</sub>, 100  $\mu$ M GTP, 0.02  $\mu$ M HO-D17R>p (shown with the 3' ribonucleoside shaded and the <sup>32</sup>P-label denoted by  $\bullet$ ), and RtcB as specified were incubated at 37  $^{\circ}$ C for 30 min. The products were analyzed by urea-PAGE and visualized by autoradiography. The positions of the linear substrate and ligated circle are indicated (*Right*). (B) Reaction mixture containing 50 mM Tris-HCl (pH 8.0), 2 mM MnCl<sub>2</sub>, 100  $\mu$ M GTP, 1  $\mu$ M RtcB, and 0.02  $\mu$ M HO-D17R>p was incubated at 37  $^{\circ}$ C. Aliquots were withdrawn at the times specified and quenched immediately. The products were analyzed by urea-PAGE and visualized by autoradiography. The positions of the linear substrate and guanylated intermediate are indicated (*Left*); the position of the ligated circle is indicated (*Right*).

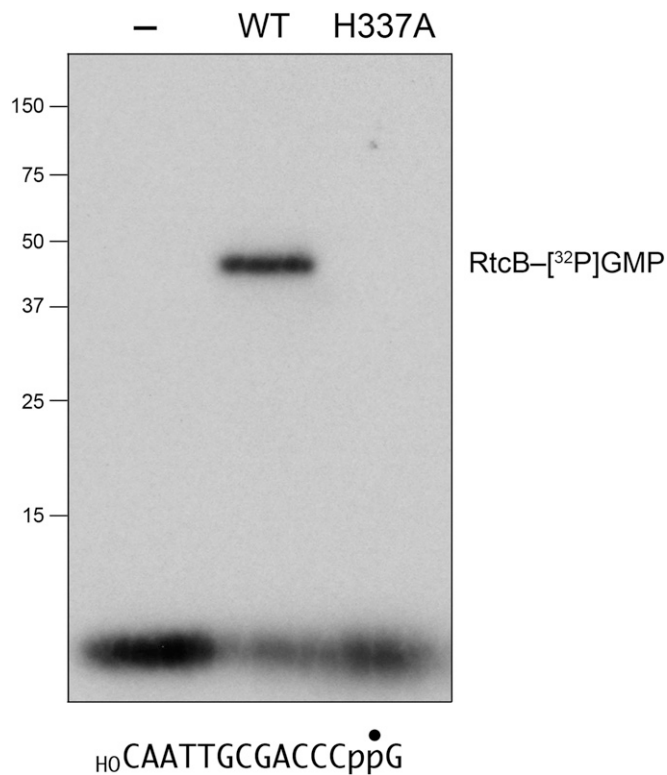

**Fig. S2.** Transfer of guanylate from DNAppG to RtcB to form RtcB-GMP. Reaction mixtures (10  $\mu$ L) containing 50 mM Tris-HCl (pH 8.0), 2 mM  $MnCl_2$ , 0.1  $\mu$ M of gel-purified  $^{32}P$ -GMP-labeled DNAppG (shown with the  $^{32}P$ -label denoted by  $\bullet$ ), and either no enzyme (lane -) or 2  $\mu$ M wild-type RtcB (WT) or H337A mutant were incubated at 37  $^{\circ}C$  for 20 min. The products were analyzed by SDS/PAGE; an autoradiograph of the dried gel is shown. The RtcB-GMP adduct is indicated (Right). The positions and sizes (in kilodaltons) of marker polypeptides are indicated (Left).

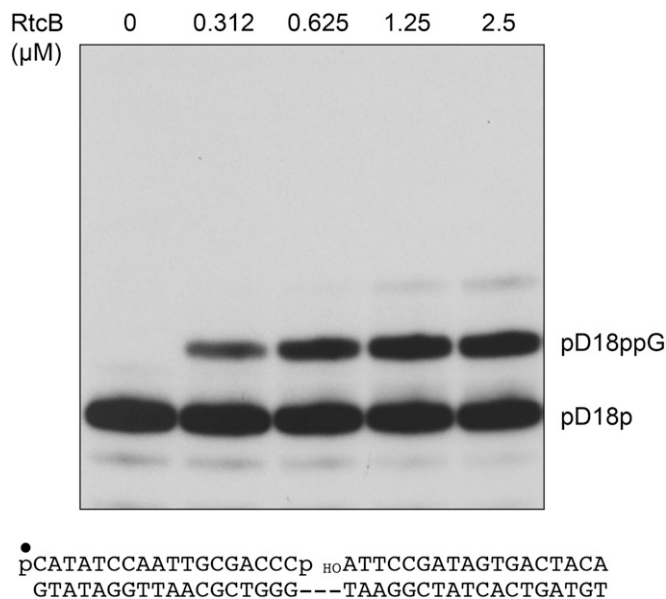

**Fig. S3.** *E. coli* RtcB guanylylates but does not seal a 3'- $PO_4/5'$ -OH nick in duplex DNA. The 5'- $^{32}P$ -labeled 3'- $PO_4/5'$ -OH nicked duplex DNA substrate is shown (Lower) with the  $^{32}P$ -label denoted by  $\bullet$ . The substrate was prepared by annealing the labeled 18-mer pDNA strand (pD18p) and the unlabeled 18-mer  $HO$ DNA $OH$  strand to the unlabeled 36-mer template strand and then separating the nicked duplex from single strands and two-strand tailed duplexes by native polyacrylamide gel electrophoresis. The three-strand nicked duplex was located by autoradiography and then eluted from an excised gel slice by soaking overnight at 4  $^{\circ}C$  in 10 mM Tris-HCl (pH 8.0), 1 mM EDTA. RtcB reaction mixtures (10  $\mu$ L) containing 50 mM Tris-HCl (pH 8.0), 2 mM  $MnCl_2$ , 100  $\mu$ M GTP, 0.1  $\mu$ M nicked duplex DNA, and RtcB as specified were incubated at 37  $^{\circ}C$  for 30 min. The products were analyzed by urea-PAGE and visualized by autoradiography. No labeled species corresponding to a 36-mer nick sealing product was detected.

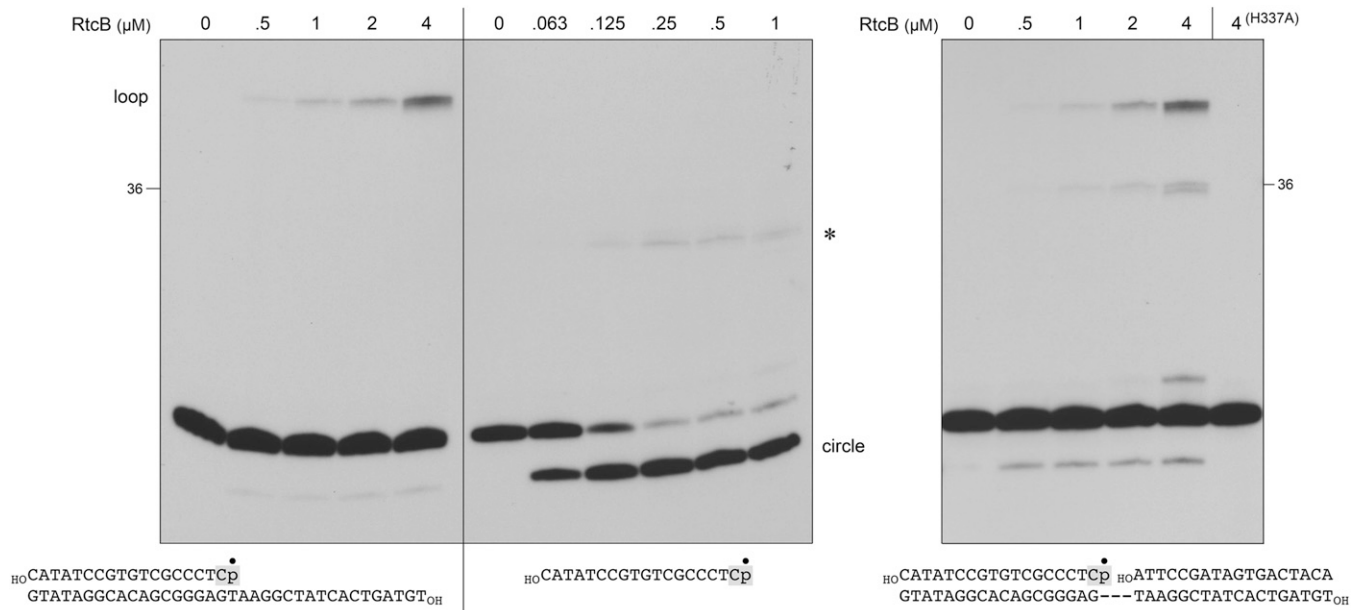

**Fig. 54.** Effect of duplex secondary structure on ligation of a  ${}^{\text{HO}}\text{D17Rp}$  strand. The 3'  ${}^{32}\text{P}$ -labeled D17Rp single strand is shown (Lower Center) with the  ${}^{32}\text{P}$ -label denoted by  $\bullet$  and the terminal ribonucleotide shaded in gray. The 5'-OH tailed duplex substrate (Lower Left) was prepared by annealing the labeled D17Rp strand to the unlabeled 36-mer template strand. The nicked duplex substrate (Lower Right) was prepared by annealing the labeled D17Rp strand and the unlabeled 18-mer  ${}^{\text{HO}}\text{DNA}_{\text{OH}}$  strand to the unlabeled 36-mer template strand. The tailed duplex and three-strand nicked duplex were purified by native gel electrophoresis and eluted from excised gel slices by soaking overnight at 4 °C in 10 mM Tris-HCl (pH 8.0), 100 mM NaCl, 1 mM EDTA. RtcB reactions (10 μL) containing 50 mM Tris-HCl (pH 8.0), 2 mM  $\text{MnCl}_2$ , 0.1 mM GTP, 0.02 μM  ${}^{32}\text{P}$ -labeled D17Rp single-strand, tailed-duplex, or nicked-duplex substrates and RtcB as specified were incubated at 37 °C for 30 min. The products were analyzed by urea-PAGE and visualized by autoradiography. The position of a 5'  ${}^{32}\text{P}$ -labeled 36-mer marker DNA strand (of identical sequence to the expected nick sealing product) that was analyzed in parallel is indicated (Left and Right). RtcB efficiently catalyzed intramolecular ligation of the D17Rp single strand to form a circular product that migrated faster than the linear substrate. A minor product corresponding to a dimer circle is denoted by the asterisk to the Right of the Center panel. Annealing of D17Rp to the 36-mer suppressed circularization, allowing for only inefficient joining of the 3'- $\text{PO}_4$  to the 5'-OH of the tailed duplex to form a stem-loop product (loop).
